# Supplementary material for: CT informs detection and treatment options in rheumatoid arthritis complicated by pulmonary non-tuberculous mycobacterial disease from the FIRST registry
Source: HighWire-hosted journal article supplement (doi:10.1136/rmdopen-2023-004049), 2024-06-01

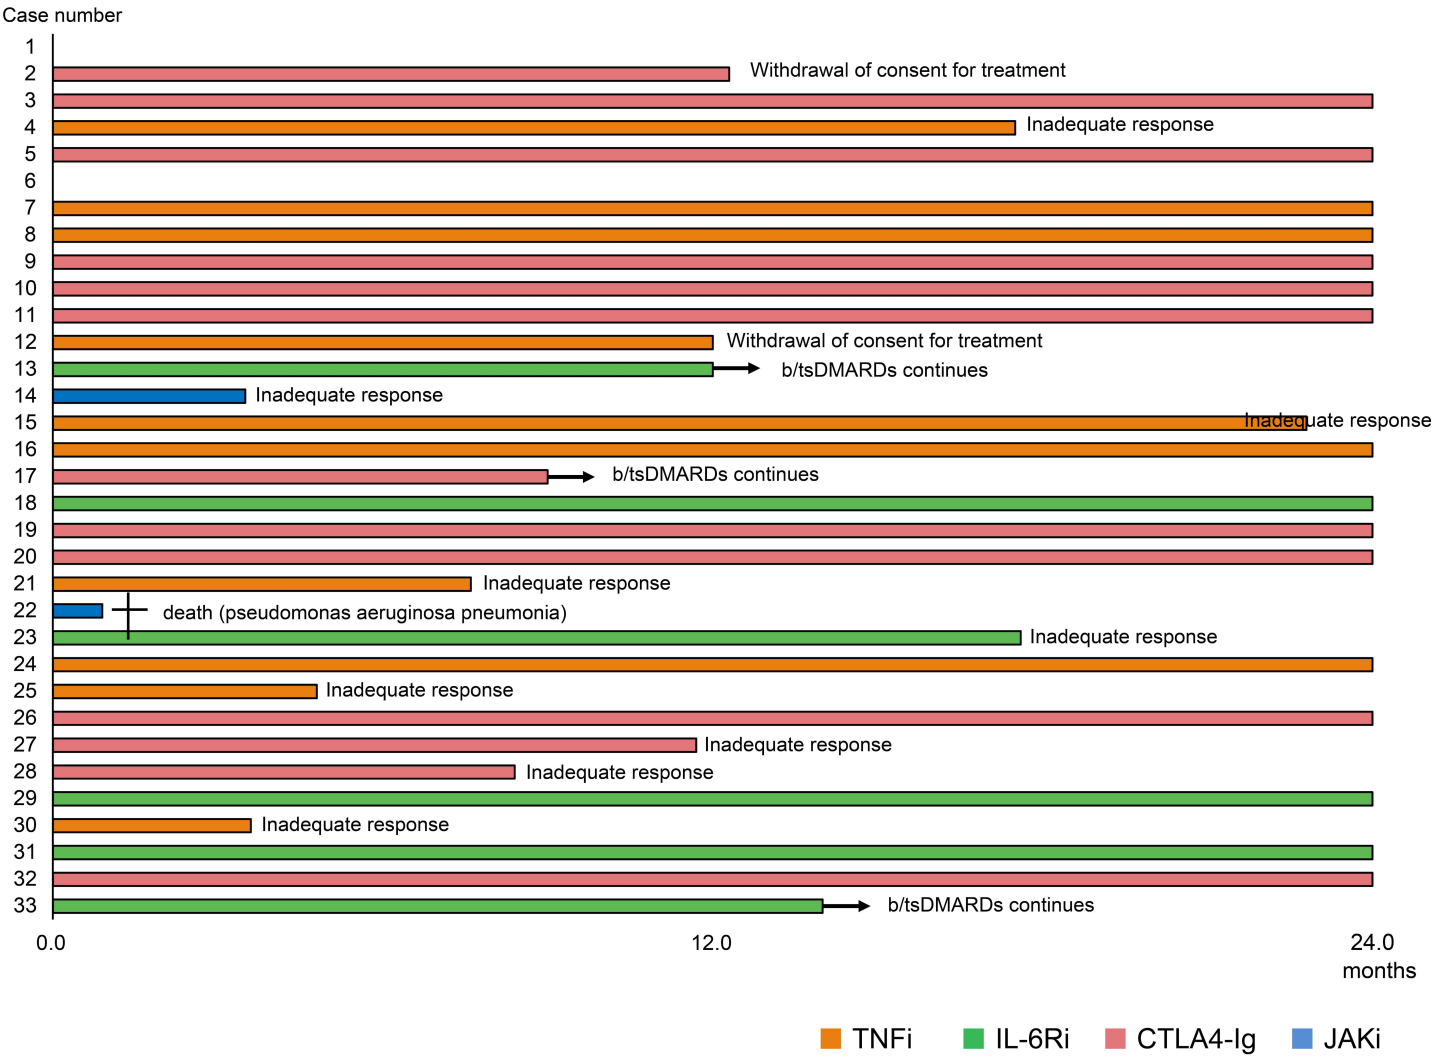

Supplement: rmdopen-2023-004049supp004_data_supplement.pdf [file rmdopen-2023-004049supp004_data_supplement.pdf]
